# Supplementary material for: A novel K-ion battery: hexacyanoferrate(ii)/graphite cell
Source: Royal Society of Chemistry journal article supplement (doi:10.1039/c7ta00220c), 2017-01-01
Supplement: c7ta00220c1.pdf [file c7ta00220c1.pdf]

## Supporting Information for

### **A novel K-ion battery; hexacyanoferrate(II)/graphite cell**

Xiaofei Bie<sup>1</sup>, Kei Kubota<sup>1,2</sup>, Tomooki Hosaka<sup>2</sup>, Kuniko Chihara<sup>2</sup>, and  
Shinichi Komaba<sup>1,2, \*</sup>

<sup>1</sup>*Elements Strategy Initiative for Catalysts and Batteries (ESICB), Kyoto  
University, 1-30 Goryo-Ohara, Nishikyo-ku, Kyoto 615-8245, Japan*

<sup>2</sup>*Department of Applied Chemistry, Tokyo University of Science, Shinjuku,  
Tokyo 162-8601, Japan*

*\*corresponding author, [komaba@rs.kagu.tus.ac.jp](mailto:komaba@rs.kagu.tus.ac.jp)*

## Experimental Section

*Materials:* K-MnHCFE and K-FeHCFE powder were synthesized by precipitation method. Firstly, 2 mmol  $\text{K}_4\text{Fe}(\text{CN})_6 \cdot 3\text{H}_2\text{O}$  and 4 mmol  $\text{MnCl}_2 \cdot 4\text{H}_2\text{O}$  or  $\text{FeCl}_2 \cdot 4\text{H}_2\text{O}$  were dissolved into 80 and 40 ml saturated KCl solution at 25 °C. Then, these two solutions were slowly dropped together with magnetic stirring under  $\text{N}_2$  atmosphere at 60 °C. 4 hours later, the precipitate formed was centrifuged and washed thoroughly with 1 L deionized water. At last, the final product was obtained after drying in air under 80 °C for 12 h.

*Electrochemical Characterization:* The positive electrodes consisted of 70 wt% active materials, 20 wt% Ketjen black carbon, and 10 wt% polytetrafluoroethylene (PTFE). The negative electrodes for the full cell consisted 90 wt% nature graphite (average particle size  $\approx 3 \mu\text{m}$ ) and 10 wt% carboxymethyl cellulose (CMC) binder <sup>1</sup>. The positive and negative electrodes formed on Al mesh and foil, respectively, were dried at 150 °C under vacuum. For K half-cell, metallic potassium (Aldrich) was used as a negative electrode. The electrolyte solution was 0.7 mol  $\text{dm}^{-3}$   $\text{KPF}_6$  dissolved in EC:DEC (1:1) solvent (Kishida Chemical). A glass fiber filter (GB-100R, ADVANTEC) was used as a separator. R2032-type coin cells were assembled in Ar-filled glove box (dew point:  $< -70 \text{ }^\circ\text{C}$ ).

*Material Characterization:* X-ray diffraction (XRD) data were collected using Multiflex (Rigaku Co., Ltd., Japan) with Cu  $\text{K}\alpha$  radiation at 40 kV and 20 mA. For operando XRD, in-situ battery cell equipped with Be window (Rigaku) was assembled and galvanostatically cycled at a current rate of 5 mA  $\text{g}^{-1}$ . The recording

time for one diffraction pattern is around 7 min. Morphology of as-prepared samples was observed by scanning electron microscope (SEM, S-5000, Hitachi). Thermal behavior of the synthesized powders (sample amount, 8 mg) was tested by TGA (Shimadzu DTG-60, Japan). Elemental ratio of K, Mn, and Fe was determined by ICP-AES analysis after dissolving the samples in HCl solutions.

**Table S1** Structural parameters of K-MnHCF and K-FeHCF obtained from Rietveld analysis.

| Sample K-MnCHFe                                                                          |          |           |           |           |                          |         |
|------------------------------------------------------------------------------------------|----------|-----------|-----------|-----------|--------------------------|---------|
| S.G. $P2_1/n$ $a=10.1126(7)$ Å, $b=7.3285(9)$ Å, $c=6.9711(5)$ Å, $\beta=90.06(9)^\circ$ |          |           |           |           |                          |         |
| Atom                                                                                     | Wyckoff. | $x$       | $y$       | $z$       | $B_{iso} / \text{\AA}^2$ | Occ     |
| Mn                                                                                       | $2a$     | 0         | 0.5       | 0.5       | 0.5(7)                   | 1       |
| Fe                                                                                       | $2a$     | 0         | 0         | 0         | 0.5(7)                   | 0.94(2) |
| N1                                                                                       | $4e$     | 0.4608(7) | 0.2587(8) | 0.8347(2) | 1.2(1)                   | 0.94(2) |
| N2                                                                                       | $4e$     | 0.0507(1) | 0.3303(3) | 0.7674(4) | 1.2(1)                   | 0.94(2) |
| N3                                                                                       | $4e$     | 0.1993(2) | 0.4822(4) | 0.3925(6) | 1.2(1)                   | 0.94(2) |
| C1                                                                                       | $4e$     | 0.5308(2) | 0.6329(1) | 0.2686(5) | 1.2(1)                   | 0.94(2) |
| C2                                                                                       | $4e$     | 0.9497(6) | 0.7767(5) | 0.1433(8) | 1.2(1)                   | 0.94(2) |
| C3                                                                                       | $4e$     | 0.6925(1) | 0.5146(7) | 0.5684(5) | 1.2(1)                   | 0.94(2) |
| K                                                                                        | $4e$     | 0.7549(4) | 0.9368(7) | 0.4817(4) | 2.9(5)                   | 0.89(5) |
| O1                                                                                       | $4e$     | =x(N1)    | =y(N1)    | =z(N1)    | 1.2(1)                   | 0.06(2) |
| O2                                                                                       | $4e$     | =x(N2)    | =y(N2)    | =z(N2)    | 1.2(1)                   | 0.06(2) |
| O3                                                                                       | $4e$     | =x(N2)    | =y(N2)    | =z(N2)    | 1.2(1)                   | 0.06(2) |
| O4                                                                                       | $4e$     | 0.2718(8) | 0.0767(4) | 0.5548(1) | 1.2(1)                   | 0.11(2) |
| R <sub>p</sub> =9.79 %, R <sub>wp</sub> =9.17 %, R <sub>e</sub> =4.71 %, Chi2=3.785      |          |           |           |           |                          |         |

| Sample K-FeHCFe                                                                          |          |           |            |           |                        |         |
|------------------------------------------------------------------------------------------|----------|-----------|------------|-----------|------------------------|---------|
| S.G. $P2_1/n$ $a=10.1250(9)$ Å, $b=7.2562(9)$ Å, $c=7.0238(1)$ Å, $\beta=89.68(3)^\circ$ |          |           |            |           |                        |         |
| Atom                                                                                     | Wyckoff. | $x$       | $y$        | $z$       | $B_{iso}/\text{\AA}^2$ | Occ     |
| Fe1                                                                                      | $2a$     | 0         | 0.5        | 0.5       | 1.0(9)                 | 1       |
| Fe2                                                                                      | $2a$     | 0         | 0          | 0         | 1.0(9)                 | 0.89(7) |
| N1                                                                                       | $4e$     | 0.4905(3) | 0.2376(3)  | 0.7926(7) | 0.2(2)                 | 0.89(7) |
| N2                                                                                       | $4e$     | 0.0168(3) | 0.2737(2)  | 0.7880(3) | 0.2(2)                 | 0.89(7) |
| N3                                                                                       | $4e$     | 0.2202(2) | 0.5209(1)  | 0.4459(2) | 0.2(2)                 | 0.89(7) |
| C1                                                                                       | $4e$     | 0.5130(7) | 0.6040(6)  | 0.2891(5) | 0.2(2)                 | 0.89(7) |
| C2                                                                                       | $4e$     | 0.9159(1) | 0.7654(4)  | 0.1342(1) | 0.2(2)                 | 0.89(7) |
| C3                                                                                       | $4e$     | 0.6919(7) | 0.5343(3)  | 0.5564(3) | 0.2(2)                 | 0.89(7) |
| K                                                                                        | $4e$     | 0.7536(4) | 0.9444(7)  | 0.4832(2) | 4.3(1)                 | 0.82(4) |
| O1                                                                                       | $4e$     | =x(N1)    | =y(N1)     | =z(N1)    | 0.2(2)                 | 0.11(2) |
| O2                                                                                       | $4e$     | =x(N2)    | =y(N2)     | =z(N2)    | 0.2(2)                 | 0.11(2) |
| O3                                                                                       | $4e$     | =x(N2)    | =y(N2)     | =z(N2)    | 0.2(2)                 | 0.11(2) |
| O4                                                                                       | $4e$     | 0.3478(7) | -0.0665(1) | 0.7978(5) | 0.2(2)                 | 0.16(1) |
| $R_p=11.7\%$ , $R_{wp}=9.87\%$ , $R_e=7.7\%$ , $\text{Chi}^2=1.644$                      |          |           |            |           |                        |         |

**Table S2** ICP results.

| K-MnHCFe   |      |    |      |
|------------|------|----|------|
| element    | K    | Mn | Fe   |
| Mole ratio | 1.75 | 1  | 0.93 |
| K-FeHCFe   |      |    |      |
| element    | K    | Fe |      |
| Mole ratio | 0.88 | 1  |      |

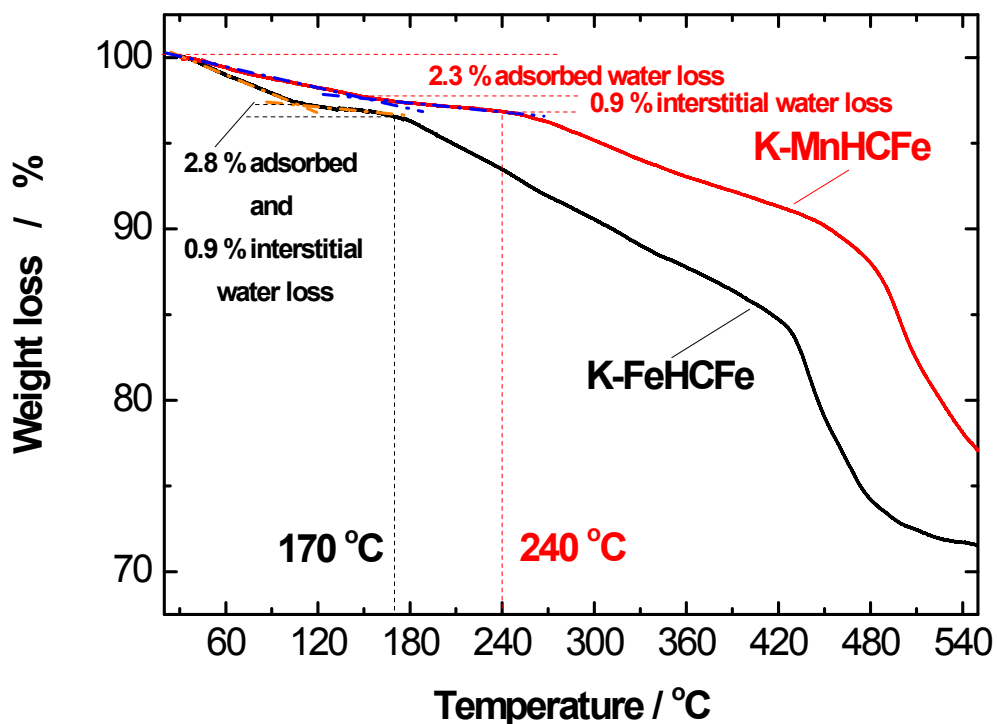

**Figure S1** TG curves of K-MnHCFE and K-FeHCFE. The TGA test was conducted at a heating rate of 1 °C min<sup>-1</sup> under Ar gas flow. K-MnHCFE shows two slopes from room temperature to 240 °C, which are corresponding to 2.3% adsorbed and 0.9% interstitial water loss. And a rapid weight loss was observed above 240 °C, which indicates the compound decomposition. Similar behavior is found in the TGA curve of K-FeHCFE.

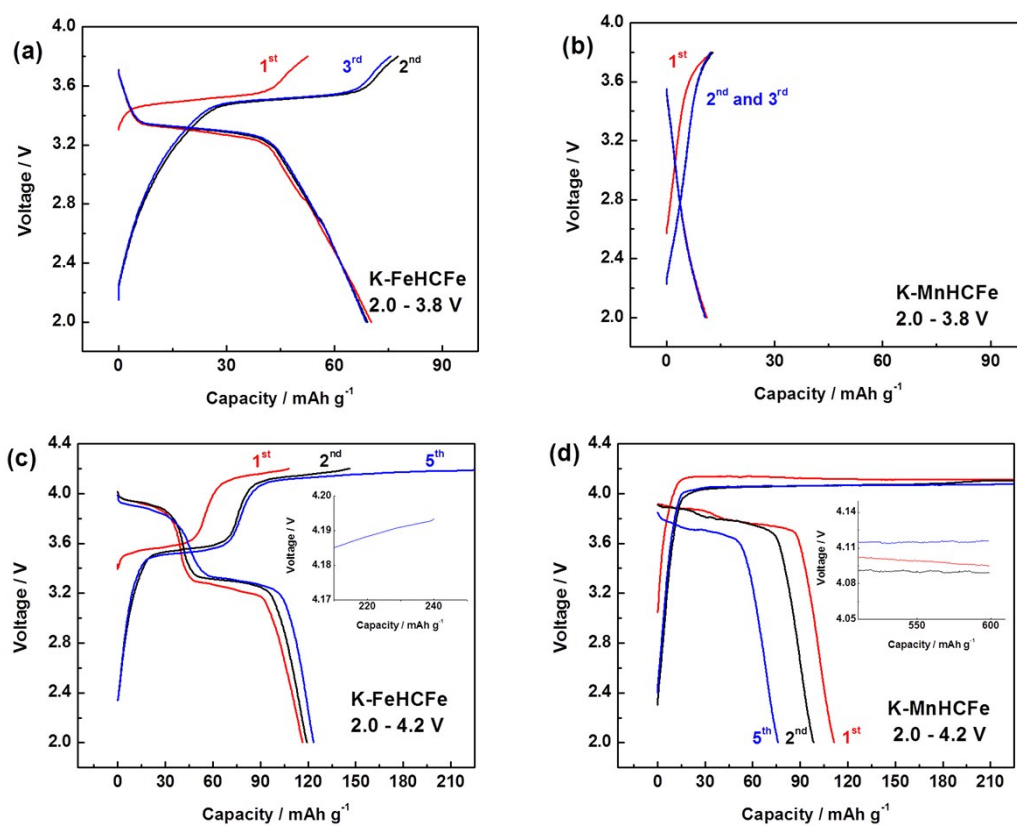

**Figure S2** Charge-discharge profiles of (a,c) K-FeHCF and (b,d) K-MnHCF electrode in K half-cell with 1 M KFSI in EC: DEC (1:1) electrolyte under voltage range of (a,b) 2.0-3.8 and (c,d) 2.0-4.2 V.

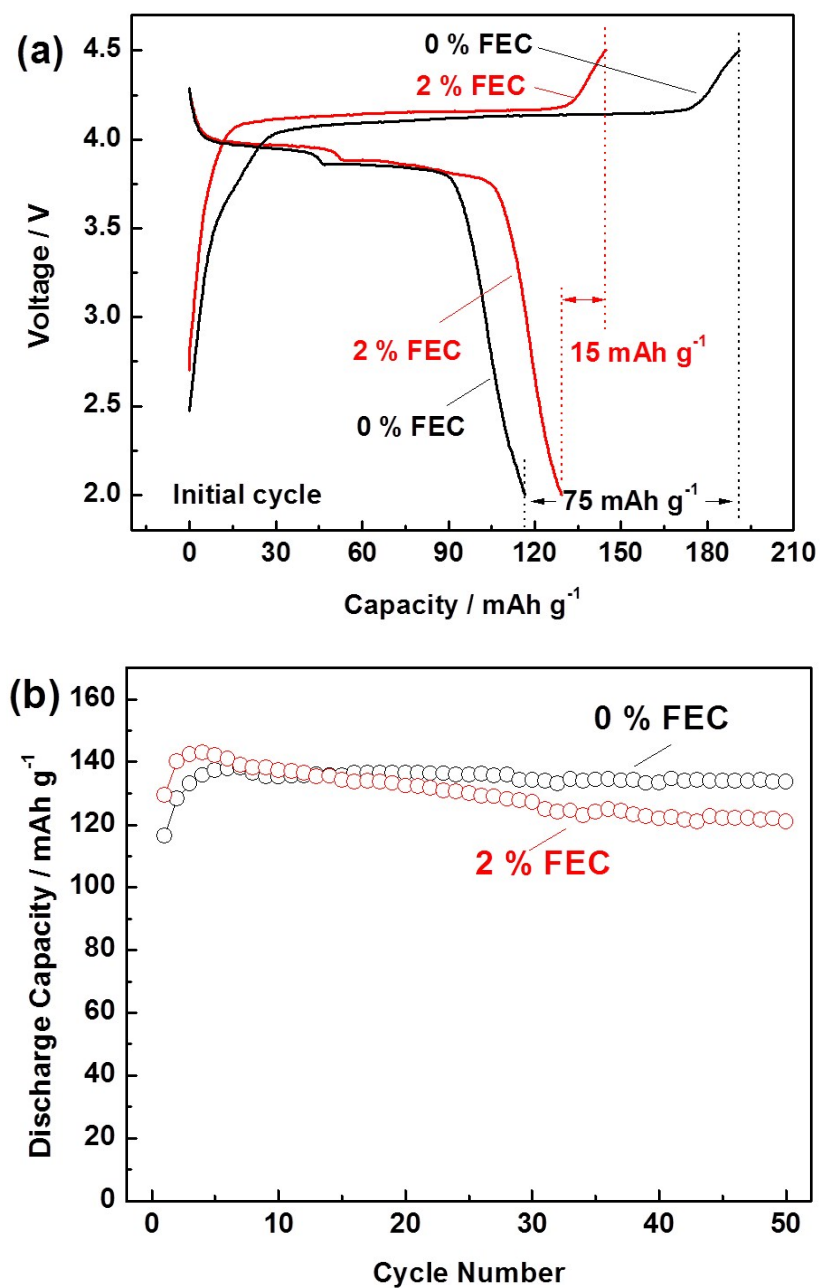

**Figure S3 (a)** Initial charge-discharge profiles and **(b)** cycle performance of K-MnHCFc electrode in K half-cell with 0.7 M KPF<sub>6</sub> in EC:DEC (1:1) electrolyte with 0 % and 2 % FEC additive.



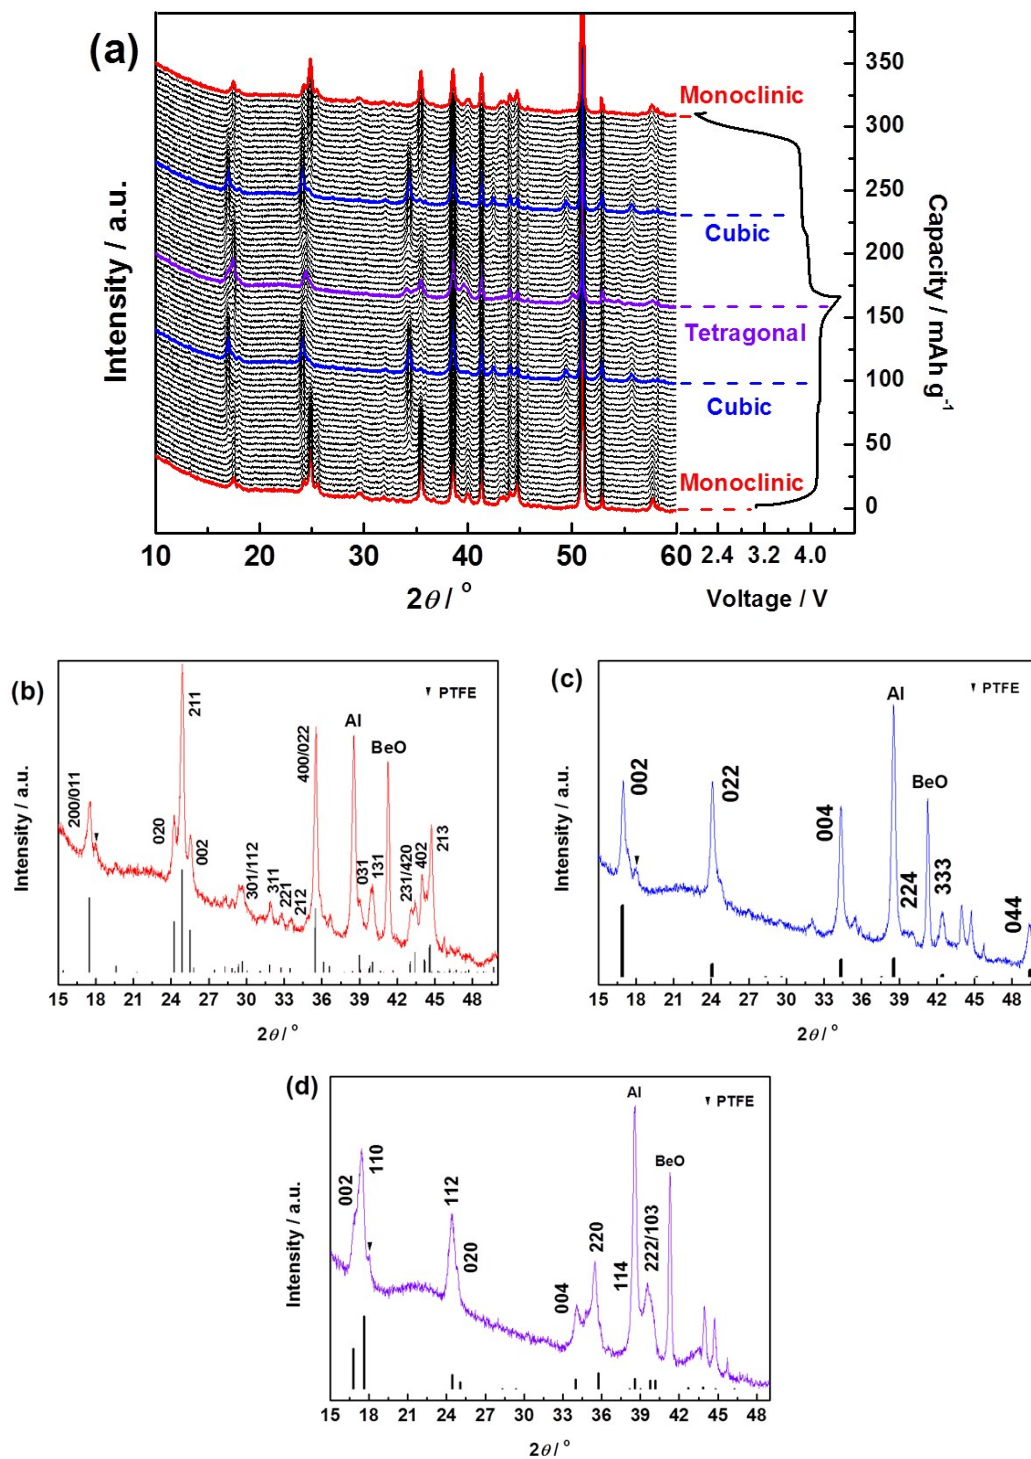

**Figure S4 (a)** In-situ XRD patterns of K-MnHCFc during initial cycle and indexed XRD patterns of K-MnHCFc electrodes under different charge state: **(b)** pristine electrode (monoclinic), **(c)** half charged electrode (cubic) and **(d)** fully charged (tetragonal).

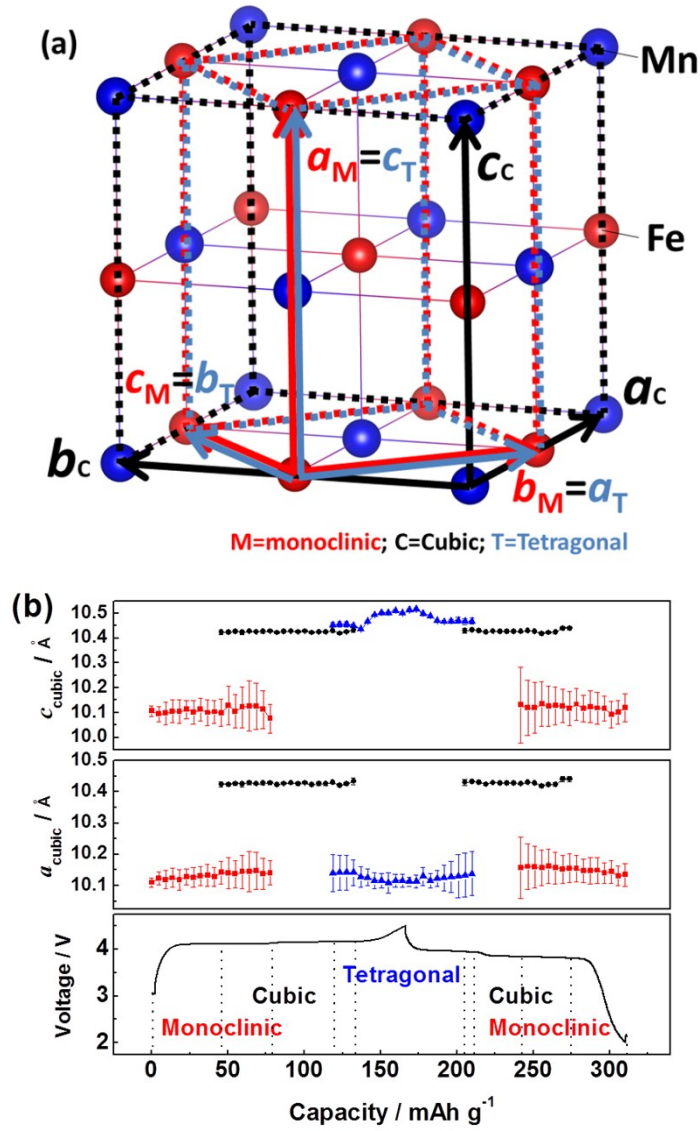

**Figure S5 (a)** Scheme of K-MnHCF framework with monoclinic (M), cubic (C) and tetragonal (T) lattices. **(b)** The evolution of lattice parameters along cubic axis  $a$  and  $c$  directions during initial charge-discharge. According to the scheme, lattice parameters of monoclinic and tetragonal could be normalized to those in a cubic lattice as:

$$a_C = \sqrt{b_M^2 + c_M^2} = \sqrt{a_T^2 + b_T^2}$$

$$c_C = a_M \times \sin\beta_M = c_T$$

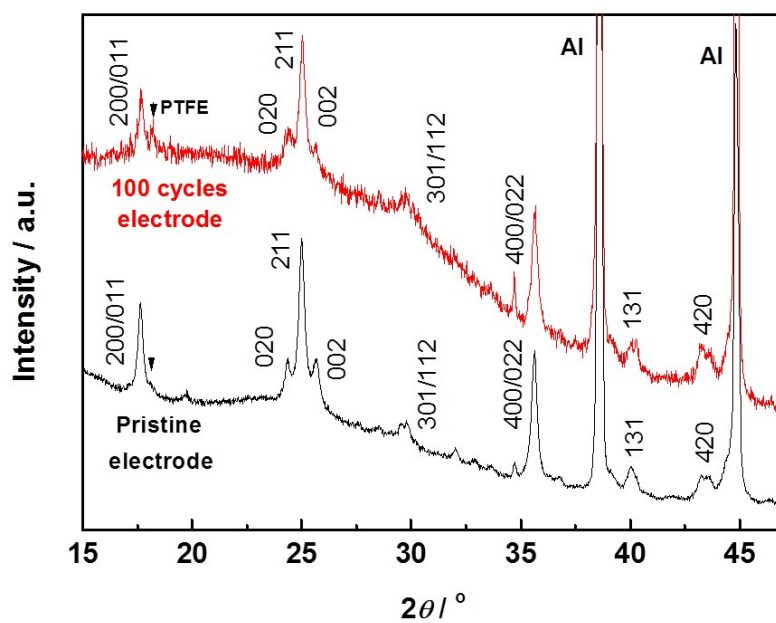

**Figure S6** XRD patterns of K-MnHCFe pristine electrode and the electrode after 100 cycles in the voltage range of 2.0-4.5 V at a current density of 30 mA g<sup>-1</sup>.

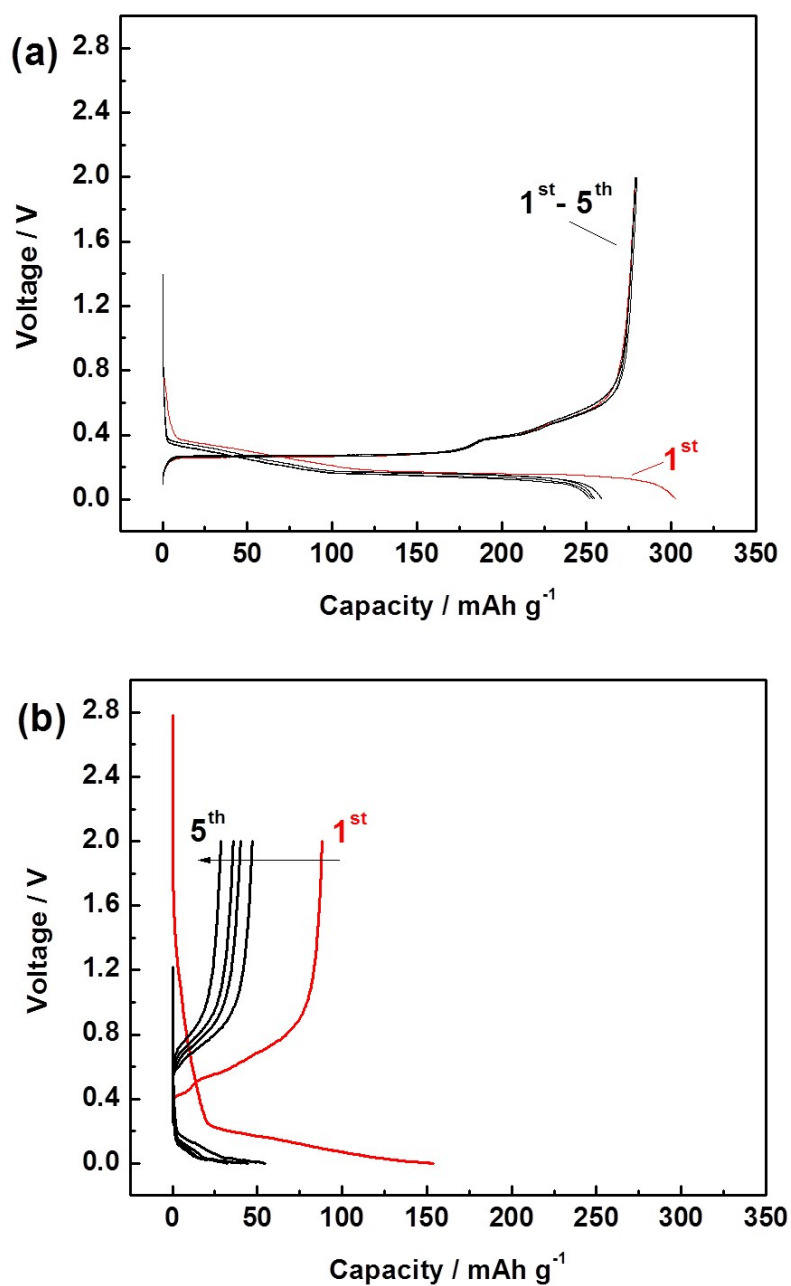

**Figure S7** Charge-discharge profiles of graphite negative electrode in K half-cell with 0.7 M KPF<sub>6</sub> in EC:DEC (1:1) electrolyte with **(a)** 0 % FEC and **(b)** 2 % FEC additive.

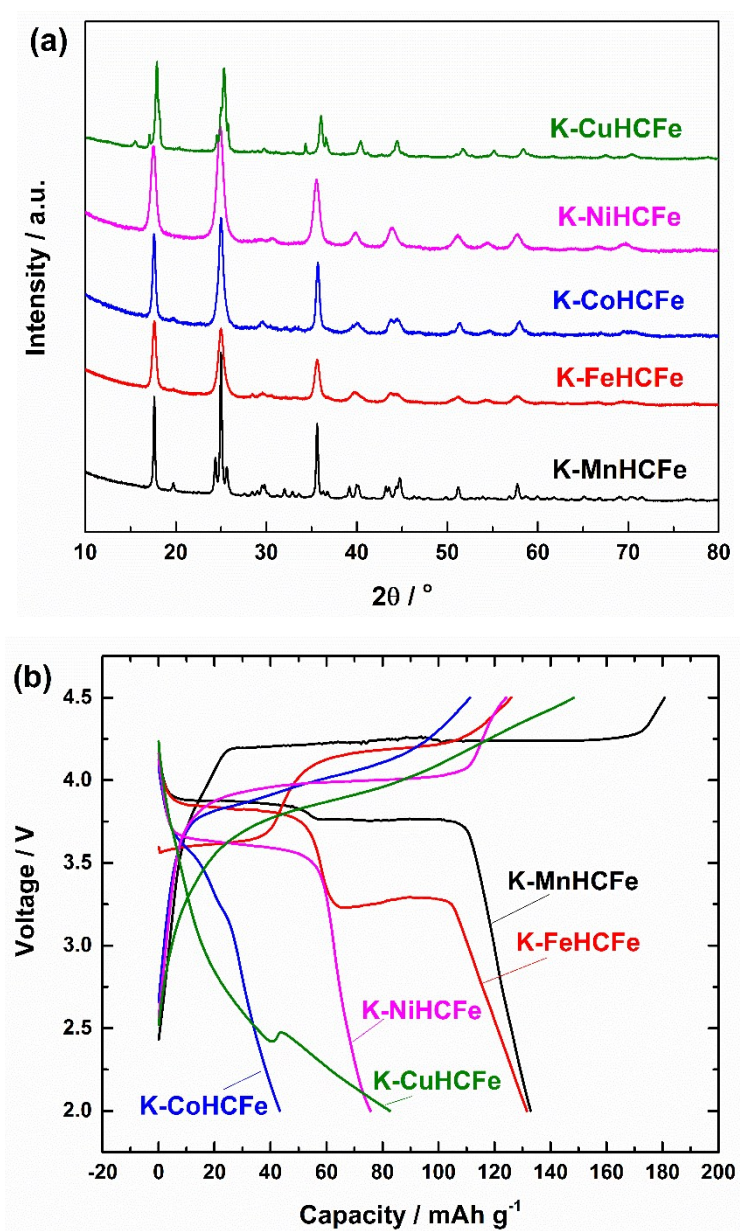

**Figure S8** (a) XRD patterns of K-MHCFe (M=Mn, Fe, Co, Ni, Cu), (b) initial charge-discharge curves of K-MHCFe.

#### Reference:

1. S. Komaba, T. Hasegawa, M. Dahbi and K. Kubota, *Electrochem. Commun.* 2015, **60**, 172-175.
